# Supplementary material for: BYSL contributes to tumor growth by cooperating with the mTORC2 complex in gliomas
Source: PubMed Central journal article supplement (PMC7877178; doi:10.20892/j.issn.2095-3941.2020.0096), 2021-02-15
Supplement: cbm-18-088-s001.pdf [file cbm-18-088-s001.pdf]

## Supplementary materials

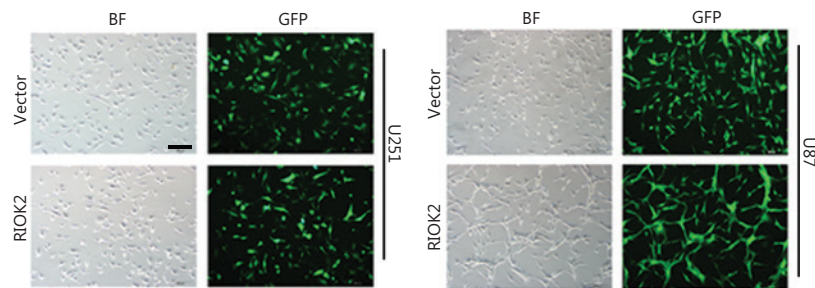

**Figure S1** The efficiency of RIOK2 overexpression in glioma cells. The representative bright field and fluorescent field images of the vector and RIOK2 groups in U251 and U87 cells. Scale bar: 200  $\mu$ m.

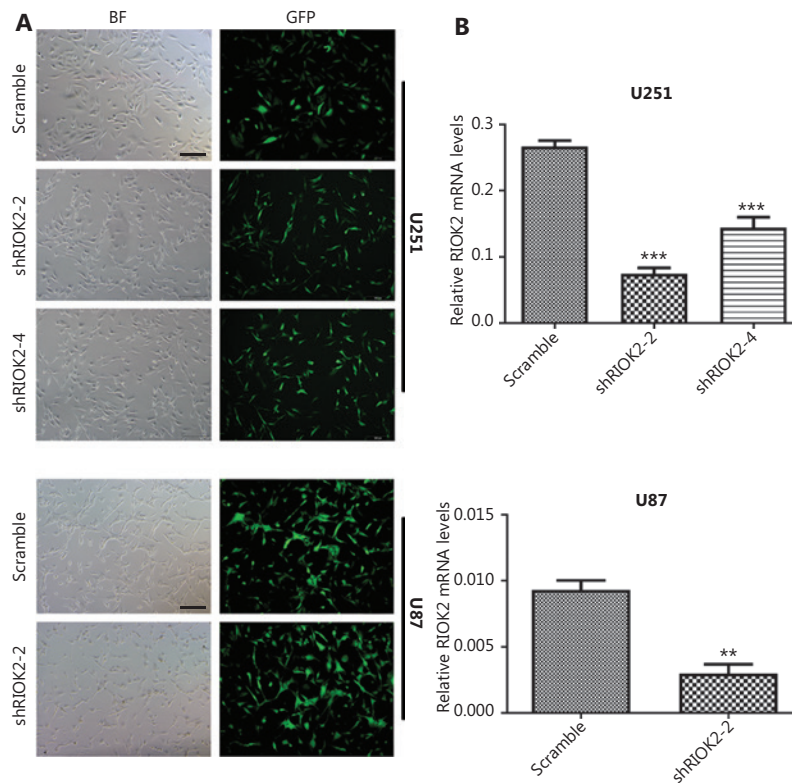

**Figure S2** The efficiency of RIOK2 downregulation in glioma cells. (A) The representative bright field and fluorescent field images of the scramble and shRIOK2 groups in U251 and U87 cells. Scale bar: 200  $\mu$ m. (B) The qRT-PCR revealed that silencing of RIOK2 significantly down-regulated the RIOK2 mRNA levels (\*\* $P < 0.01$ ; \*\*\* $P < 0.001$ ).

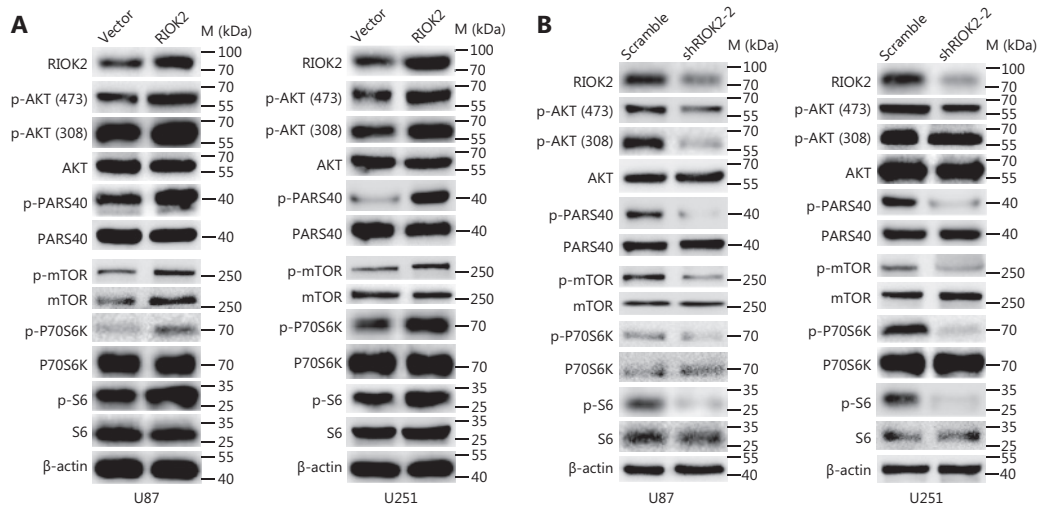

**Figure S3** The effects of RIOK2 knockdown or overexpression on the AKT and mTOR signaling in glioma cells. Western blot analyses were performed in U251 and U87 cells. (A) Overexpression of RIOK2 led to an increase in the p-AKT (473 and 308), p-PARS40, p-mTOR, mTOR, p-P70S6K, and p-S6 levels. (B) Silencing of RIOK2 caused a decrease in the p-AKT (473 and/or 308), p-PARS40, p-mTOR, p-P70S6K and p-S6 levels. M, molecular marker.

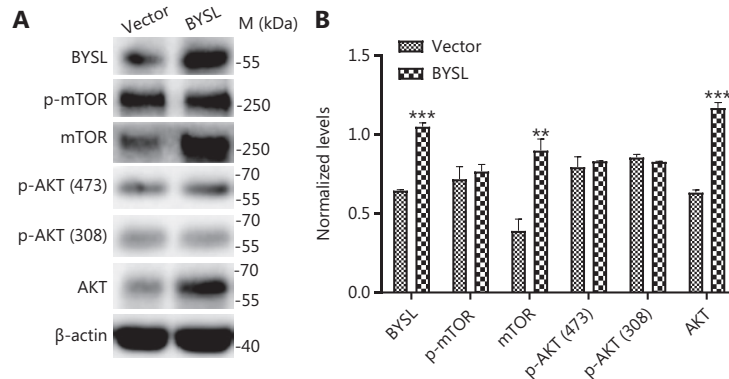

**Figure S4** The effects of FLAG-BYSL plasmid transfected into glioma cells on AKT and mTOR signaling. Western blot analysis was performed in U251 cells. Representative blot images of FLAG-BYSL plasmid transfection are shown in A. Graphs quantifying the blot images of FLAG-BYSL plasmid transfection are shown in B. M, molecular marker (\*\* $P < 0.01$ ; \*\*\* $P < 0.001$ ).

**Table S1** Clinicopathological information for the studied subjects

| Case No. | Code No. | Gender | Age (years) | Used for         | WHO grade |
|----------|----------|--------|-------------|------------------|-----------|
| 1        | 912226   | F      | 54          | WB               | Nontumor  |
| 2        | 928412   | M      | 48          | WB               | Nontumor  |
| 3        | 941814   | M      | 20          | WB               | Nontumor  |
| 4        | 968605   | F      | 69          | WB               | Nontumor  |
| 5        | 971400   | F      | 30          | WB, IHC          | Nontumor  |
| 6        | 972078   | F      | 49          | WB, IHC, qRT-PCR | Nontumor  |
| 7        | 981488   | M      | 41          | WB               | Nontumor  |
| 8        | 1004728  | M      | 63          | WB, IHC, qRT-PCR | Nontumor  |
| 9        | 1024827  | F      | 46          | WB               | Nontumor  |
| 10       | 1026751  | M      | 66          | IHC              | Nontumor  |
| 11       | 1095392  | M      | 32          | WB, IHC, qRT-PCR | Nontumor  |
| 12       | 1233247  | F      | 49          | qRT-PCR          | Nontumor  |
| 13       | 1237928  | M      | 53          | qRT-PCR          | Nontumor  |
| 14       | 1241213  | F      | 54          | qRT-PCR          | Nontumor  |
| 15       | 1615150  | M      | 40          | qRT-PCR          | Nontumor  |
| 16       | 1619563  | F      | 17          | qRT-PCR          | Nontumor  |
| 17       | 970570   | M      | 52          | WB               | Grade II  |
| 18       | 1019453  | F      | 43          | IHC              | Grade II  |
| 19       | 1029589  | M      | 31          | WB               | Grade II  |
| 20       | 1031768  | M      | 23          | IHC              | Grade II  |
| 21       | 1049476  | M      | 50          | IHC              | Grade II  |
| 22       | 1052079  | F      | 47          | IHC              | Grade II  |
| 23       | 1110685  | F      | 27          | WB               | Grade II  |
| 24       | 1140811  | F      | 49          | WB               | Grade II  |
| 25       | 1145933  | F      | 48          | WB               | Grade II  |
| 26       | 1152968  | F      | 63          | WB               | Grade II  |
| 27       | 1157139  | M      | 42          | WB, qRT-PCR      | Grade II  |
| 28       | 1158620  | M      | 43          | WB, qRT-PCR      | Grade II  |
| 29       | 1161905  | M      | 73          | qRT-PCR          | Grade II  |
| 30       | 1164493  | M      | 64          | WB, qRT-PCR      | Grade II  |
| 31       | 1174937  | M      | 27          | qRT-PCR          | Grade II  |
| 32       | 1190502  | M      | 31          | WB, qRT-PCR      | Grade II  |
| 33       | 1196273  | M      | 40          | WB, qRT-PCR      | Grade II  |
| 34       | 1197520  | M      | 40          | qRT-PCR          | Grade II  |
| 35       | 1245545  | M      | 27          | qRT-PCR          | Grade II  |

Table S1 (continued)

| Case No. | Code No. | Gender | Age (years) | Used for    | WHO grade |
|----------|----------|--------|-------------|-------------|-----------|
| 36       | 920498   | M      | 50          | WB          | Grade III |
| 37       | 922050   | F      | 19          | WB          | Grade III |
| 38       | 926714   | M      | 56          | WB          | Grade III |
| 39       | 947804   | F      | 66          | WB          | Grade III |
| 40       | 986708   | M      | 47          | WB          | Grade III |
| 41       | 999737   | M      | 52          | WB, IHC     | Grade III |
| 42       | 1020742  | F      | 35          | IHC         | Grade III |
| 43       | 1032540  | F      | 69          | IHC         | Grade III |
| 44       | 1081283  | F      | 58          | WB          | Grade III |
| 45       | 1117547  | M      | 47          | WB          | Grade III |
| 46       | 1145935  | M      | 23          | WB          | Grade III |
| 47       | 1164248  | F      | 66          | WB, qRT-PCR | Grade III |
| 48       | 1182956  | M      | 48          | IHC         | Grade III |
| 49       | 1191197  | M      | 68          | WB, qRT-PCR | Grade III |
| 50       | 1234213  | F      | 59          | qRT-PCR     | Grade III |
| 51       | 1241430  | F      | 19          | qRT-PCR     | Grade III |
| 52       | 1246522  | M      | 34          | qRT-PCR     | Grade III |
| 53       | 1260826  | M      | 78          | qRT-PCR     | Grade III |
| 54       | 1315290  | M      | 39          | qRT-PCR     | Grade III |
| 55       | 1413682  | F      | 44          | qRT-PCR     | Grade III |
| 56       | 947968   | M      | 62          | IHC         | Grade IV  |
| 57       | 966838   | M      | 50          | IHC         | Grade IV  |
| 58       | 1075388  | M      | 58          | IHC         | Grade IV  |
| 59       | 1077922  | M      | 43          | WB          | Grade IV  |
| 60       | 1086721  | F      | 64          | IHC         | Grade IV  |
| 61       | 1088070  | F      | 58          | WB, IHC     | Grade IV  |
| 62       | 1096129  | M      | 61          | WB          | Grade IV  |
| 63       | 1119597  | F      | 50          | WB          | Grade IV  |
| 64       | 1132842  | F      | 62          | WB          | Grade IV  |
| 65       | 1140776  | M      | 26          | WB          | Grade IV  |
| 66       | 1141904  | M      | 47          | WB          | Grade IV  |
| 67       | 1147166  | M      | 58          | WB          | Grade IV  |
| 68       | 1147279  | F      | 64          | WB          | Grade IV  |
| 69       | 1164493  | M      | 66          | WB          | Grade IV  |
| 70       | 1184604  | F      | 34          | WB          | Grade IV  |

**Table S1** (continued)

| Case No. | Code No. | Gender | Age (years) | Used for | WHO grade |
|----------|----------|--------|-------------|----------|-----------|
| 71       | 1204760  | F      | 65          | qRT-PCR  | Grade IV  |
| 72       | 1204815  | M      | 43          | qRT-PCR  | Grade IV  |
| 73       | 1223892  | M      | 66          | qRT-PCR  | Grade IV  |
| 74       | 1242288  | M      | 26          | qRT-PCR  | Grade IV  |
| 75       | 1252386  | F      | 54          | qRT-PCR  | Grade IV  |
| 76       | 1271138  | M      | 30          | qRT-PCR  | Grade IV  |
| 77       | 1516156  | M      | 49          | qRT-PCR  | Grade IV  |
| 78       | 1550918  | M      | 42          | qRT-PCR  | Grade IV  |

Note: F, female; M, male; WB, Western blot; qRT-PCR, quantitative real-time PCR; IHC, immunohistochemistry; WHO, World Health Organization.
